# Supplementary material for: Synthesis and characterization of the hexagonal prismatic cage {THF⊂[PhB(CN)3]6[Cp*Rh]6}6+
Source: Royal Society of Chemistry journal article supplement (doi:10.1039/b401505c), 2004-01-01
Supplement: b401505c.doc [file b401505c.doc]

# Supplementary Material

# Experimental

**General.** Standard Schlenk techniques were employed in all syntheses. [Cp*RhCl2]2, PhBCl2, LiCN∙DMF, Me2S∙BHBr2,and AgCN were prepared according to literature methods or purchased from Aldrich. Elemental analyses were conducted by the School of Chemical Sciences Microanalytical Laboratory. 11B, 13C and 1H NMR spectra were acquired on Varian Unity 300, 400, and 500 NMR spectrometers. Infrared spectra were acquired on a Mattson Infinity Gold FTIR spectrometer using CaF2 solution cells or with KBr pellets. Electrospray ionization-mass spectra (ESI-MS) and MS-MS measurements were acquired using a Micromass Quattro QHQ quadrupole-hexapole-quadrupole instrument. PPN[HB(CN)3] was prepared by a modification of the published procedure.

**[K(18-crown-6)]PhB(CN)3**. A finely ground sample of 5.21 g (80 mmol) of KCN in 1 L flask was dehydrated by heating at 100 C under dynamic vacuum for 20 h. The cooled sample was treated with a solution of 6.1 g (25 mmol) of 18-crown-6 in 350 mL of THF. This mixture was refluxed for 20 h, cooled to 0 C, and then treated with a solution of 2.66 mL (20 mmol) of PhBCl2 in 80 mL of cold (0 C) THF. The reaction mixture was refluxed for 72 h. The resulting reaction mixture was cooled to room temperature and filtered through Celite in air. The filtrate was evaporated to dryness and the resulting crude solid was washed with Et2O. The crude material was extracted into 10 mL of CH2Cl2, and this solution was passed through 15 x 2.5 cm column of alumina (90 active, acidic, 70-230 mesh) followed by a washing with a further 200 mL of CH2Cl2. The filtrate was evaporated to dryness, and the residue was recrystallized from 10 mL of MeCN by the addition of 80 mL of Et2O. Yield: 5.95 g (63%). IR (CH3CN): CN 2135 cm-1. 1H NMR (CD3CN):  7.49 (m, 2H, C6H5), 7.29 (m, 2H, C6H5), 7.22 (m, 1H, C6H5), 3.55 (s, 24H, OCH2CH2O). 13C NMR (CD3CN):  133.4 (C6H5), 128.8 (C6H5), 127.7 (C6H5), 129.0-130.8 (q*, J*B-C = 65 Hz, CN), 70.7 (OCH2CH2O). 11B NMR (CDCl3):  -28.5 (s). ESI-MS: m/z = 166.1. Anal. Calcd for C21H29N3BKO6 (found): C, 53.35 (53.74); H, 6.22 (6.23), N, 8.82 (8.95).

**{THF[PhB(CN)3]6[Cp*Rh]6[OTf]6}.** To a slurry of 703 mg (1.139 mmol) of [Cp*RhCl2]2 in 50 mL of MeNO2 was added 1170 mg (4.554 mmol) of AgOTf, which resulted in yellow solution. The yellow solution was filtered directly into a solution of and 1068 mg (2.277 mmol) of [K(18-crown-6)][PhB(CN)3] in 50 mL of THF. The solution was allowed to stand for 48 h before removing the solvent in vacuo. The yellow solid was extracted with 150 mL of THF, to remove the excess [K(18-crown-6)]OTf. The resulting yellow solid was extracted into 20 mL of MeNO2, and this extract was diluted with 80 mL of THF to precipitate a yellow solid, which was collected and washed with 30 mL of Et2O. Yield: 834 mg (66%). IR (KBr, cm-1): CN = 2207, 2253. 1H NMR (CD3NO2): 1.806 (s, 90H), 7.493 (m, 6H), 7.542 (m, 12H), 7.675 (m, 12H). 11B NMR (CD3NO2): -25.6 (s). ESI-MS: m/z = 404 ([M6+]). Anal. Calcd for C120H120N18B6F18O18Rh6S6 (found): C, 43.42 (43.18); H, 3.64 (3.60); N, 7.54 (7.26). Crystals of {THF[PhB(CN)3]6[Cp*Rh]6[OTf]6} grew over the course of two weeks by vapor diffusion of THF into a solution of 25 mg of {THF[PhB(CN)3]6[Cp*Rh]6[OTf]6}in 3 mL of MeNO2.

**Crystallography.** Crystals were mounted on thin glass fibers using Paratone-N oil (Exxon) before being transferred to a Siemens Platform/CCD automated diffractometer for data collection. Data processing was performed with SAINT PLUS version 6.22. Structures were solved using direct methods and refined using full matrix least squares on F2 using the program Bruker SHELXTL version 6.10. Hydrogen atoms were fixed in idealized positions with thermal parameters 1.5 x those of the attached carbon atoms. The data were corrected for absorption on the basis of -scans. Specific details for each crystal are given in Table 2. Full crystallographic details have been deposited with the Cambridge Crystallographic Data Center as supplementary publication numbers CCDC-
